# Supplementary material for: Compact graphene/MoS2composite films for highly flexible and stretchable all-solid-state supercapacitors
Source: Royal Society of Chemistry journal article supplement (doi:10.1039/c6ta10165h), 2017-01-01
Supplement: c6ta10165h1.pdf [file c6ta10165h1.pdf]

## Supplementary Information

### **Compact graphene/MoS<sub>2</sub> composite films for highly flexible and stretchable all – solid – state supercapacitors**

Ning Li, Tian Lv, Yao Yao, Huili Li, Kai Liu, Tao Chen\*

*School of Chemical Science and Engineering, Institute of Advanced Study, Shanghai*

*Key Lab of Chemical Assessment and Sustainability, Tongji University, Shanghai,*

*200092, China. E-mail address: tchen@tongji.edu.cn.*

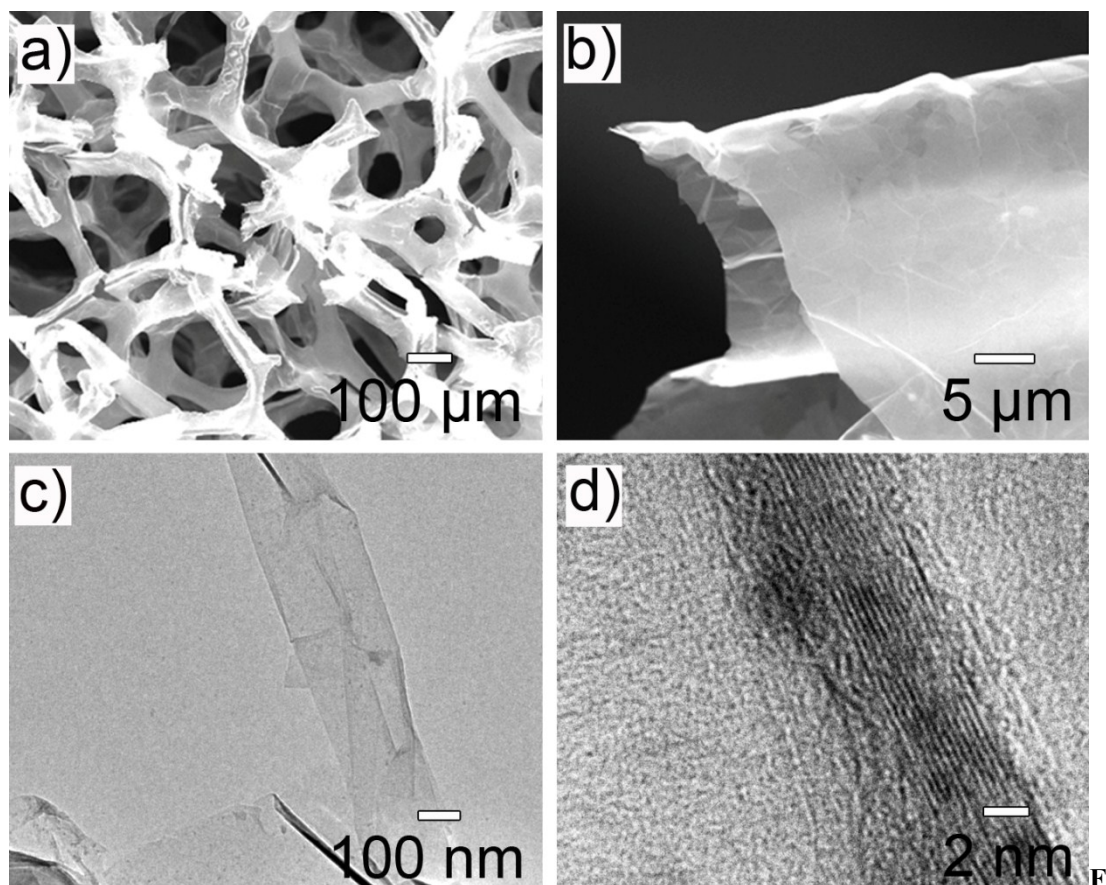

**Fig. S1** (a,b) SEM images of as-grown graphene foam after removed Ni substrate with different magnifications. (c,d) TEM images of bare graphene.

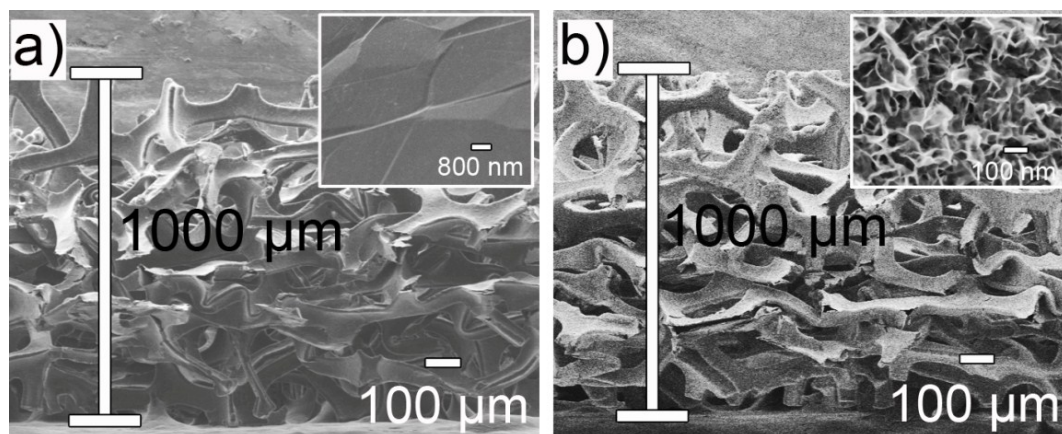

**Fig. S2** Cross-sectional SEM images of as-synthesized bare graphene and graphene/MoS<sub>2</sub> foams.

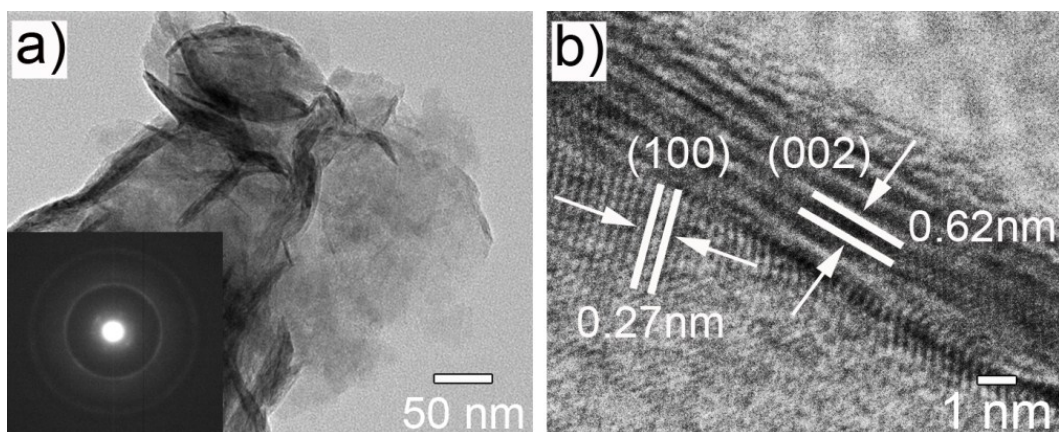

**Fig. S3** TEM images of MoS<sub>2</sub> nanosheets. Inset in (a) showed the electron diffraction pattern.

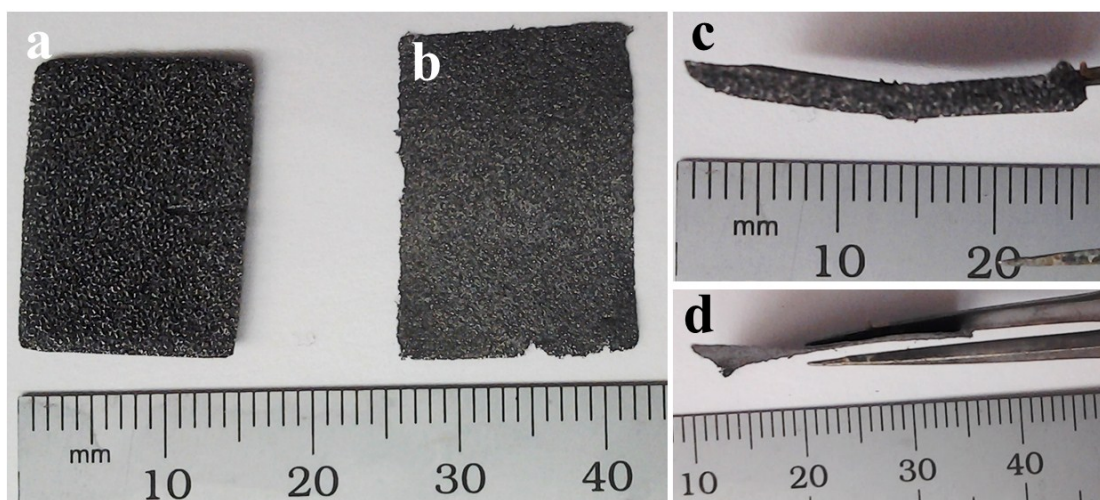

**Fig. S4** (a, b) Digital photographs of dry graphene foam before (a) and after (b) pressing. (c, d) Digital photographs of dry graphene foam before (c) and after (d) pressing from side view.

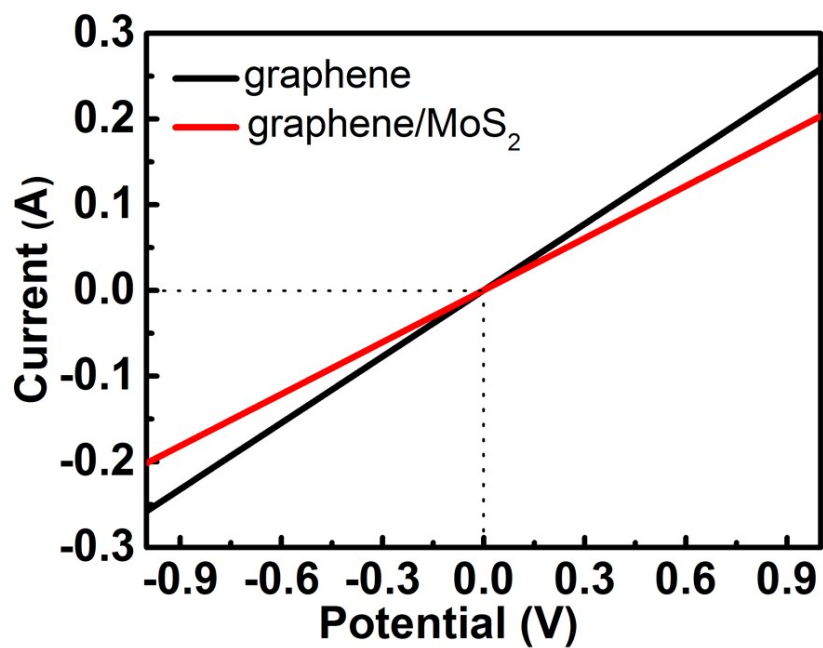

**Fig. S5** I-V curves of bare graphene film and with graphene/MoS<sub>2</sub> composite film. The effective length of samples measured was 2 cm.

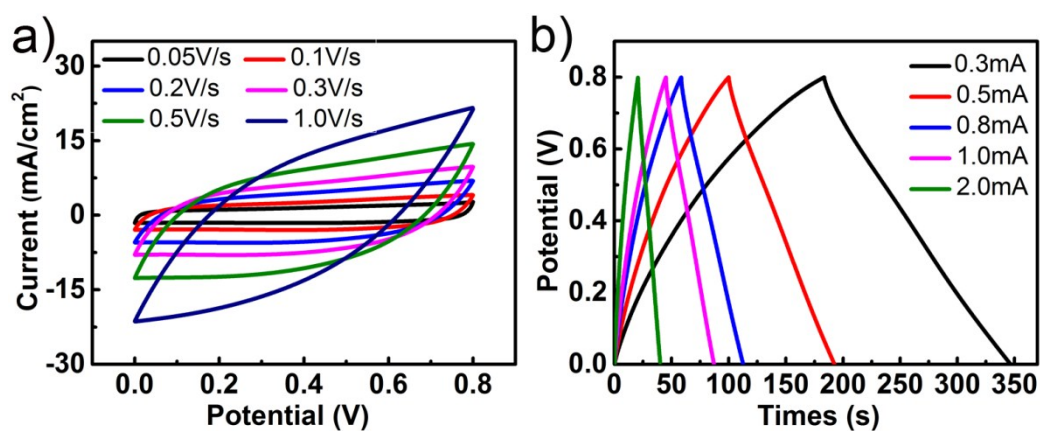

**Fig. S6** (a) CV curves of an all-solid-state supercapacitor based on graphene/MoS<sub>2</sub> composite films with 35.0 wt% of MoS<sub>2</sub> at various scanning rates. (b) GCD curves of the supercapacitor measured under different charge - discharge currents.

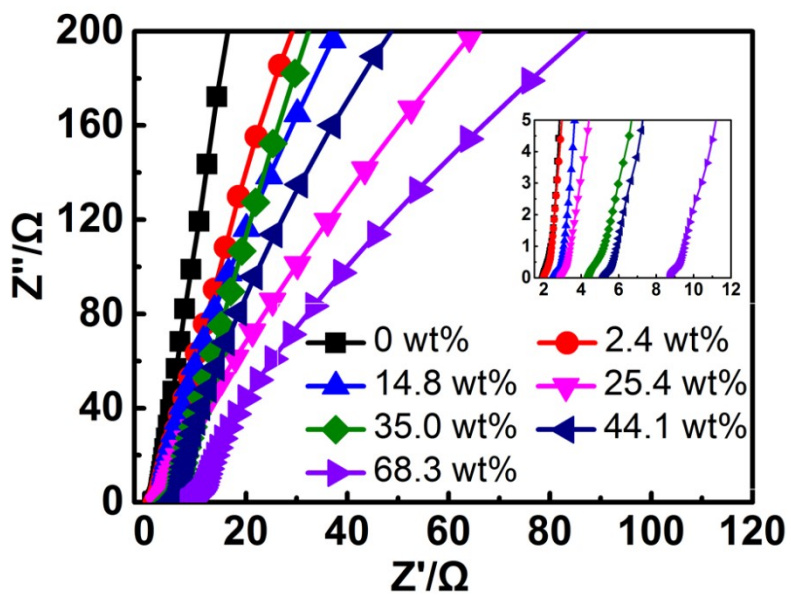

**Fig. S7** Nyquist plots of supercapacitors based on graphene/MoS<sub>2</sub> composite films with different MoS<sub>2</sub> contents (0, 2.4, 14.8, 25.4, 35.0, 44.1, and 68.3 wt%) recorded in a frequency range from 10<sup>-2</sup> to 10<sup>5</sup> Hz.

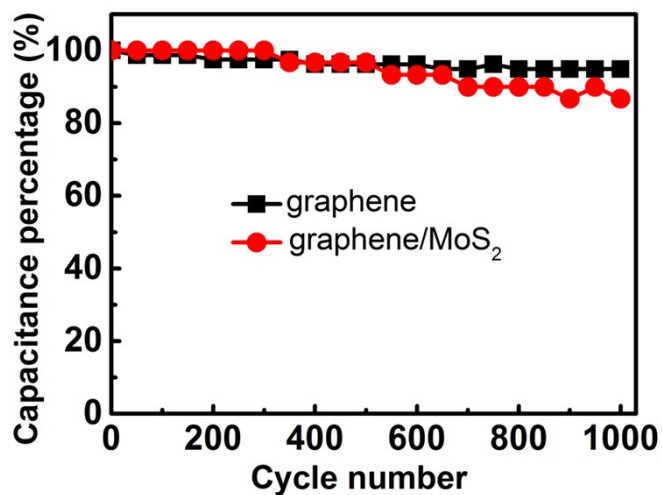

**Fig. S8** Cycling performance of supercapacitors based on bare graphene and graphene/MoS<sub>2</sub> composite films.

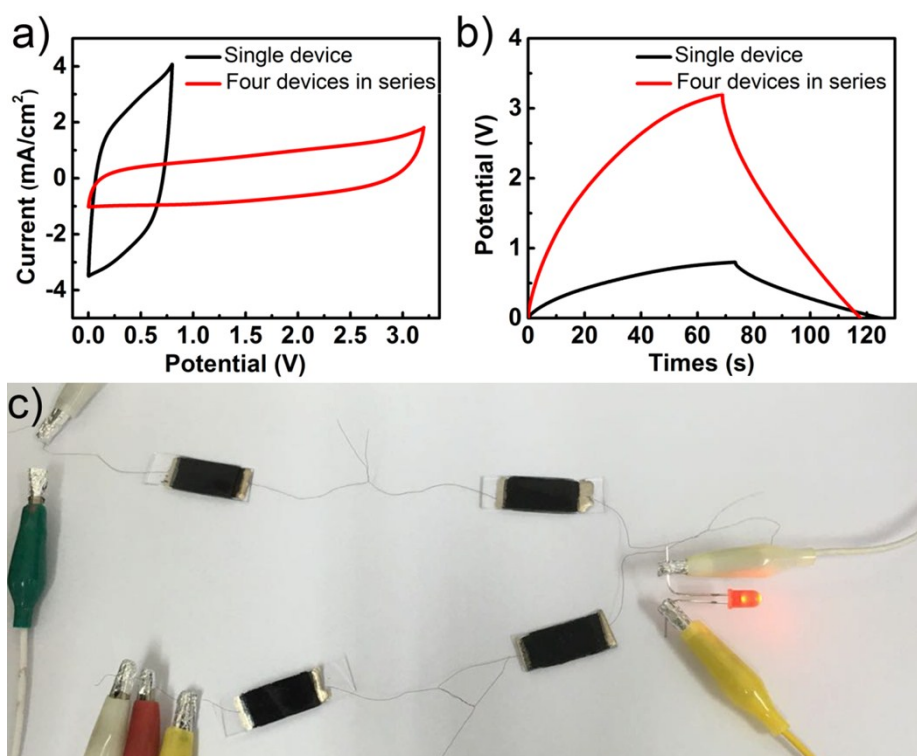

**Fig. S9** (a) CV curves of one single supercapacitor and four supercapacitors connected in series at the scan rate of 0.1 V/s. (b) Galvanostatic charge–discharge curves of one single supercapacitor and four supercapacitors connected in series at a constant charge – discharge current of 1.0 mA. (c) Digital photograph of four supercapacitors connected in series to power a red LED.

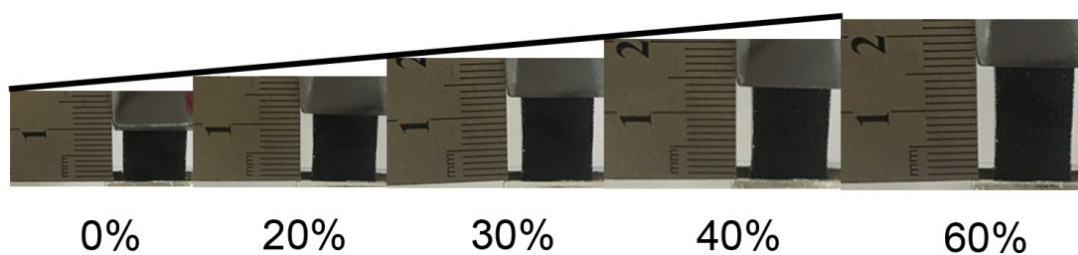

**Fig. S10** Digital photographs of a supercapacitor being stretched from 0 to 60% strain.

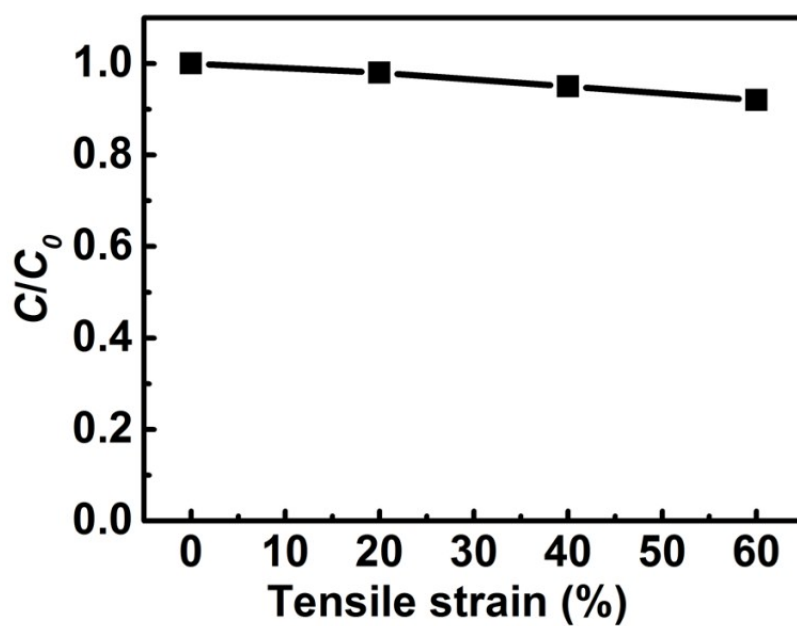

**Fig. S11** Normalized specific capacitance of a supercapacitor based on graphene/MoS<sub>2</sub> composite films as a function of tensile strains.

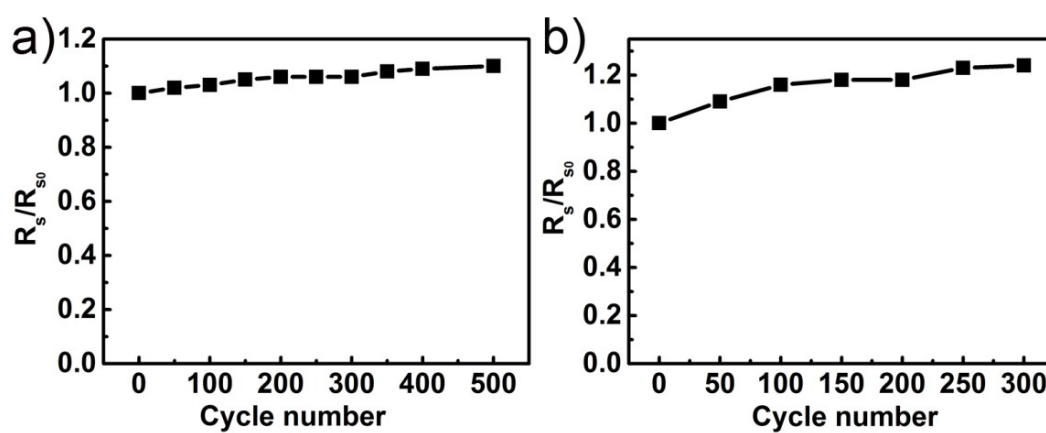

**Fig. S12** (a) Dependence of series resistances of a graphene/MoS<sub>2</sub> - based supercapacitor on the bending cycles. (b) Dependence of series resistance of a graphene/MoS<sub>2</sub> - based supercapacitor on the stretching cycles to tensile strain of 30%.

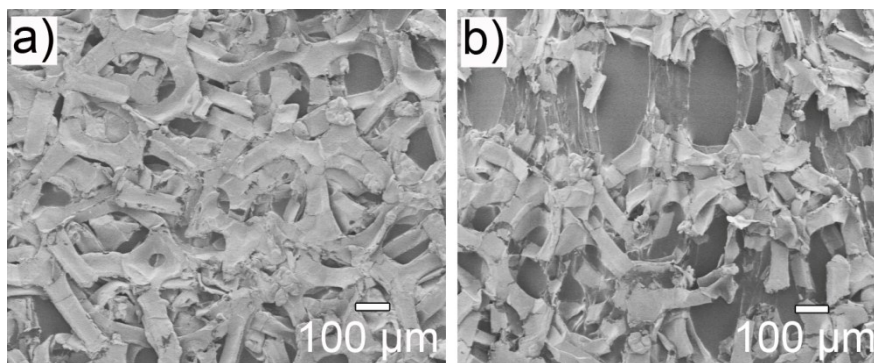

**Fig. S13** SEM images of graphene/MoS<sub>2</sub> composite film before (a) and after (b) stretched.
